# Supplementary material for: Noninvasive laser-induced photoacoustic tomography for structural and functional in vivo imaging of the brain
Source: Springer Nature journal article supplement (doi:10.1038/nbt839), 2003-06-13
Supplement: 41587_2003_BFnbt839_MOESM2_ESM.pdf [file 41587_2003_BFnbt839_MOESM2_ESM.pdf]

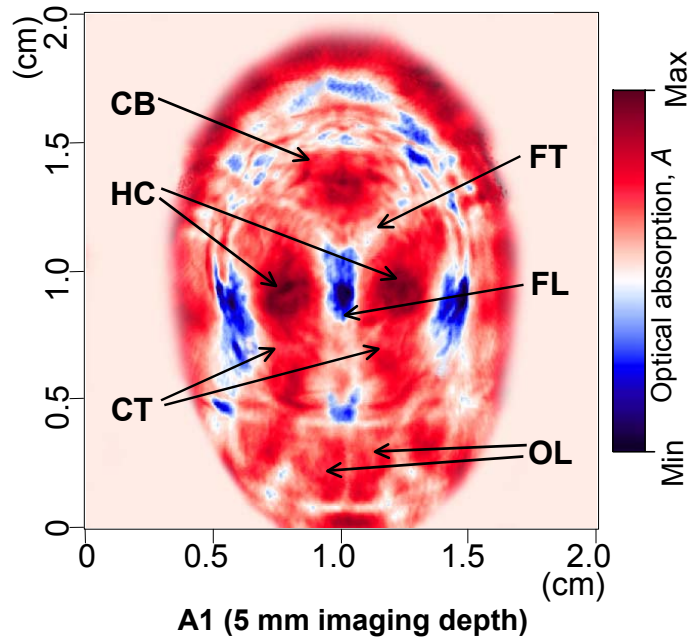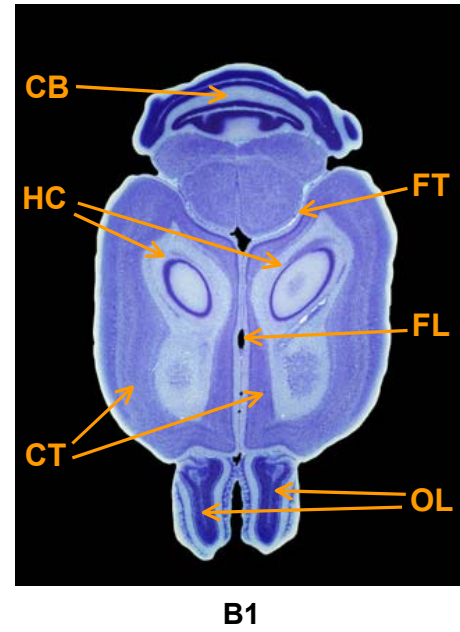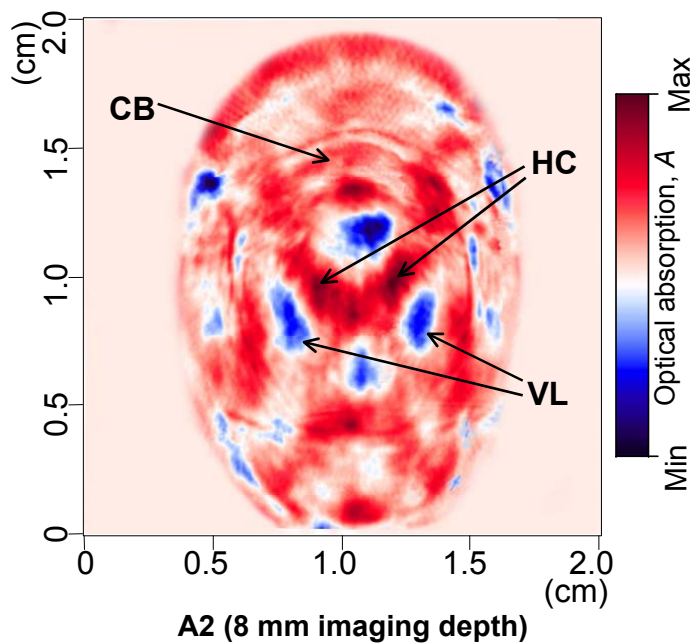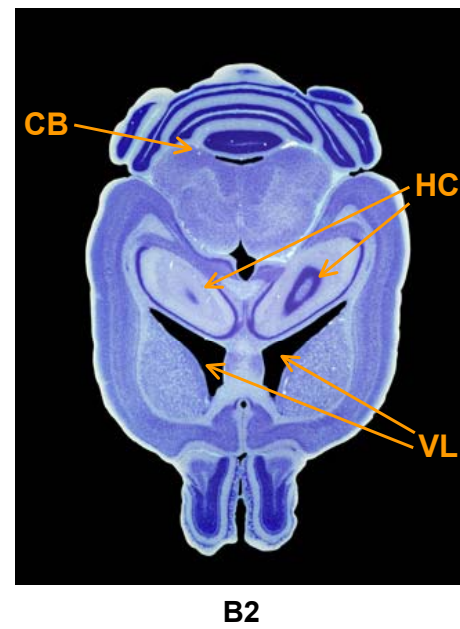

**Supplementary Figure 2** Imaging of Deep Brain in a Mouse Head Acquired with Non-invasive Photoacoustic Tomography (PAT). (A1) and (A2) are non-invasive PAT images of the cross-sections in a mouse brain, which was acquired with the skin and skull intact. The imaging depth for (A1) and (A2) are 5 mm and 8 mm, respectively. (B1) and (B2) are the anatomic photographs of the mouse brain corresponding to (A1) and (A2), respectively. CB: cerebellum; CT: cortex cerebri; FL: fissura longitudinalis cerebri; FT: fissura transversa cerebri; HC: hippocampus; OL: olfactory lobes; and VL: ventriculi laterales.
